# Supplementary material
Source: MDPI journal article supplement (https://www.mdpi.com/2077-0383/10/21/5205)
Supplement: s1 [file s1]

## Form S1. Symptom Questionnaire (SRSQ)

### 1. How would you comment your current health status?

☐ Same as prior to COVID-19 ☐ Often feel fatigue, and easier to get tired after activity now than prior to COVID-19 ☐ Better health condition than prior to COVID-19

### 2. Have you experienced any of the following pain symptoms that appeared post COVID-19 and are persistent?

☐ No ☐ Headache ☐ Myalgia ☐ Chest pain ☐ Joint pain (if yes, please fill in the table below)

☐ Any other if yes, please specify.....

| Joints                       | Hand | Foot | Wrist | Ankle | Jaw | Elbow | Shoulder | Neck | Hip | Knee |
|------------------------------|------|------|-------|-------|-----|-------|----------|------|-----|------|
| Tenderness                   |      |      |       |       |     |       |          |      |     |      |
| Swollen                      |      |      |       |       |     |       |          |      |     |      |
| Numerical pain scale (0-10)* |      |      |       |       |     |       |          |      |     |      |

\*0-No pain; 10-Intolerable pain

### 3. Do you have any of the following symptoms that are newly onset post COVID-19 and persistent?

☐ No ☐ Sore throat ☐ Difficult to swallow

### 4. Do you have any of the following symptoms that are newly onset post COVID-19 and persistent?

☐ No ☐ Low grade fever (37.3-38.0°C) ☐ Palpitations ☐ Dizziness ☐ Nasal congestion ☐ Skin rash

### 5. Are you more prone to suffer from the following symptoms after discharge?

☐ No ☐ Diarrhea ☐ Nausea ☐ Vomiting

### 6. How do you feel about your sense of smell compared with the status prior to COVID-19?

☐ Same as before ☐ Worse than before ☐ Better than before ☐ Total loss

### 7. How do you feel about your sense of taste compared with the status prior to COVID-19?

☐ Same as before ☐ Worse than before ☐ Better than before ☐ Total loss

### 8. How do you feel about your appetite compared with the status prior to COVID-19?

☐ Same as before ☐ Worse than before ☐ Better than before

**9. What do you think about your sleeping compared with the status prior to COVID-19?**

☐ Same as before ☐ Worse than before ☐ Better than before

**10. How do you feel about your muscle strength compared with the status prior to COVID-19?**

☐ Same as before ☐ Worse than before ☐ Better than before

**11. Have you experienced hair loss now compared with the status prior to COVID-19?**

☐ No hair loss before or after COVID-19 ☐ Hair loss is same as before ☐ Lose more hair than before  
☐ Lose less hair than before
